# Supplementary material for: Association of frailty with all-cause mortality and bleeding among elderly patients with acute myocardial infarction: a systematic review and meta-analysis
Source: PubMed Central journal article supplement — J Geriatr Cardiol. 2020 May;17(5):270–8. doi: 10.11909/j.issn.1671-5411.2020.05.006 (PMC7276305; doi:10.11909/j.issn.1671-5411.2020.05.006), 2020-05
Supplement: jgc-17-05-270-s001.pdf [file jgc-17-05-270-s001.pdf]

## Supplemental materials

**Supplemental Table 1S: Newcastle-Ottawa scales of the included studies.**

| Study                          | Selection                        |                                     |                           | Endpoint not present at start | Comparability               |                       | Outcome            |                    | Total |
|--------------------------------|----------------------------------|-------------------------------------|---------------------------|-------------------------------|-----------------------------|-----------------------|--------------------|--------------------|-------|
|                                | Representative of exposed cohort | Selection of the non-exposed cohort | Ascertainment of exposure |                               | Comparability (Confounding) | Assessment of outcome | Follow-up duration | Adequacy follow-up |       |
| Batty, 2019 <sup>[26]</sup>    | *                                | *                                   | *                         | *                             | *                           | *                     | *                  | *                  | 8     |
| Blanco, 2017 <sup>[27]</sup>   | *                                | *                                   | *                         | *                             | *                           | *                     | *                  | *                  | 8     |
| Calvo, 2018 <sup>[17]</sup>    | *                                | *                                   | *                         | *                             | *                           | *                     | *                  | *                  | 7     |
| Dodson, 2016 <sup>[28]</sup>   | *                                | *                                   | *                         | *                             | *                           | *                     | *                  | *                  | 8     |
| Dodson, 2018 <sup>[36]</sup>   | *                                | *                                   | *                         | *                             | **                          | *                     | *                  | *                  | 9     |
| Ekerstad, 2018 <sup>[18]</sup> | *                                | *                                   | *                         | *                             | *                           | *                     | *                  | *                  | 8     |
| Flint, 2018 <sup>[29]</sup>    | *                                | *                                   | *                         | *                             | *                           | *                     | *                  | *                  | 8     |
| Graham, 2013 <sup>[30]</sup>   | *                                | *                                   | *                         | *                             | *                           | *                     | *                  | *                  | 8     |
| Herman, 2019 <sup>[20]</sup>   | *                                | *                                   | *                         | *                             | *                           | *                     | *                  | *                  | 7     |
| Kang, 2015 <sup>[21]</sup>     | *                                | *                                   | *                         | *                             | *                           | *                     | *                  | *                  | 7     |
| Llao, 2019 <sup>[22]</sup>     | *                                | *                                   | *                         | *                             | *                           | *                     | *                  | *                  | 8     |
| Nunez, 2017 <sup>[31]</sup>    | *                                | *                                   | *                         | *                             | *                           | *                     | *                  | *                  | 8     |
| Patel, 2018 <sup>[23]</sup>    | *                                | *                                   | *                         | *                             | *                           | *                     | *                  | *                  | 8     |
| Salinas, 2016 <sup>[37]</sup>  | *                                | *                                   | *                         | *                             | *                           | *                     | *                  | *                  | 7     |
| Salinas, 2017 <sup>[24]</sup>  | *                                | *                                   | *                         | *                             | *                           | *                     | *                  | *                  | 7     |
| Salinas, 2018 <sup>[32]</sup>  | *                                | *                                   | *                         | *                             | *                           | *                     | *                  | *                  | 8     |
| Sanchis, 2014 <sup>[33]</sup>  | *                                | *                                   | *                         | *                             | *                           | *                     | *                  | *                  | 8     |
| Sigh, 2011 <sup>[34]</sup>     | *                                | *                                   | *                         | *                             | *                           | *                     | *                  | *                  | 8     |
| Sugino, 2014 <sup>[25]</sup>   | *                                | *                                   | *                         | *                             | *                           | *                     | *                  | *                  | 7     |
| White, 2015 <sup>[35]</sup>    | *                                | *                                   | *                         | *                             | **                          | *                     | *                  | *                  | 9     |

Notes: The Newcastle-Ottawa scale uses a star system (0 to 9) to evaluate included studies on 3 domains: selection, comparability, and outcomes. Star (\*)= item presents. Maximum 1 star (\*) for selection and outcome components and 2 stars (\*\*) for comparability components. Higher scores represent higher study quality.

**Supplemental Table 2S: Summary of frailty assessment tools in included studies.**

| Study                          | Clear definition of study population? | Clear definition of outcomes and assessment? | Independent assessment of outcomes? (e.g. by third party) | Sufficient Follow-up duration? | Selective loss during Follow-up? | Limitations identified? |
|--------------------------------|---------------------------------------|----------------------------------------------|-----------------------------------------------------------|--------------------------------|----------------------------------|-------------------------|
| Batty, 2019 <sup>[26]</sup>    | Yes                                   | Yes                                          | Yes                                                       | Yes                            | No                               | Yes                     |
| Blanco, 2017 <sup>[27]</sup>   | Yes                                   | Yes                                          | Yes                                                       | Yes                            | No                               | Yes                     |
| Calvo, 2018 <sup>[17]</sup>    | Yes                                   | Yes                                          | Yes                                                       | Yes                            | No                               | Yes                     |
| Dodson, 2016 <sup>[28]</sup>   | Yes                                   | Yes                                          | Yes                                                       | Yes                            | No                               | Yes                     |
| Dodson, 2018 <sup>[36]</sup>   | Yes                                   | Yes                                          | Yes                                                       | Yes                            | No                               | Yes                     |
| Ekerstad, 2018 <sup>[18]</sup> | Yes                                   | Yes                                          | Yes                                                       | Yes                            | No                               | Yes                     |
| Flint, 2018 <sup>[29]</sup>    | Yes                                   | Yes                                          | Yes                                                       | Yes                            | No                               | Yes                     |
| Graham, 2013 <sup>[30]</sup>   | Yes                                   | Yes                                          | Yes                                                       | Yes                            | No                               | Yes                     |
| Herman, 2019 <sup>[20]</sup>   | Yes                                   | Yes                                          | Yes                                                       | Yes                            | No                               | Yes                     |
| Kang, 2015 <sup>[21]</sup>     | Yes                                   | Yes                                          | Yes                                                       | Yes                            | No                               | Yes                     |
| Llao, 2019 <sup>[22]</sup>     | Yes                                   | Yes                                          | Yes                                                       | Yes                            | No                               | Yes                     |
| Nunez, 2017 <sup>[31]</sup>    | Yes                                   | Yes                                          | Yes                                                       | Yes                            | No                               | Yes                     |
| Patel, 2018 <sup>[23]</sup>    | Yes                                   | Yes                                          | Yes                                                       | Yes                            | No                               | Yes                     |
| Salinas, 2016 <sup>[37]</sup>  | Yes                                   | Yes                                          | Yes                                                       | Yes                            | No                               | Yes                     |
| Salinas, 2017 <sup>[24]</sup>  | Yes                                   | Yes                                          | Yes                                                       | Yes                            | No                               | Yes                     |
| Salinas, 2018 <sup>[32]</sup>  | Yes                                   | Yes                                          | Yes                                                       | Yes                            | No                               | Yes                     |
| Sanchis, 2014 <sup>[33]</sup>  | Yes                                   | Yes                                          | Yes                                                       | Yes                            | No                               | Yes                     |
| Sigh, 2011 <sup>[34]</sup>     | Yes                                   | Yes                                          | Yes                                                       | Yes                            | No                               | Yes                     |
| Sugino, 2014 <sup>[25]</sup>   | Yes                                   | Yes                                          | Yes                                                       | Yes                            | No                               | Yes                     |
| White, 2015 <sup>[35]</sup>    | Yes                                   | Yes                                          | Yes                                                       | Yes                            | No                               | Yes                     |
